# Supplementary material for: Comparing Different Sticky Traps to Monitor the Occurrence of Philaenus spumarius and Neophilaenus campestris, Vectors of Xylella fastidiosa, in Different Crops
Source: MDPI journal article supplement (doi:10.3390/insects14090777), 2023-09-21
Supplement: s1 [file s1]

Supplementary Table S1. Repeated measures ANOVA for the captures of spittlebugs and others Auchenorrhyncha species on colored traps hanged on olive trees

| Site A - 2018                        |          |           |    |           |    |           |     |           |    |           |    |             |    |
|--------------------------------------|----------|-----------|----|-----------|----|-----------|-----|-----------|----|-----------|----|-------------|----|
| Species                              | Traps    | May       |    | June      |    | July      |     | August    |    | September |    | Mean months |    |
| <i>P. spumarius</i>                  | Yellow   | -         |    | 3.70      | c  | 2.77      | c   | 6.68      | b  | 0.80      | b  | 3.49        | c  |
|                                      | Y-circle | -         |    | 5.68      | c  | 3.37      | c   | 6.68      | b  | 1.32      | b  | 4.26        | c  |
|                                      | Y-Line   | -         |    | 5.20      | c  | 4.03      | c   | 8.87      | b  | 1.47      | b  | 4.89        | c  |
| <i>N. campestris</i>                 | Yellow   | -         |    | 0.58      | c  | 0.17      | c   | 1.75      | b  | 0.30      | b  | 0.70        | c  |
|                                      | Y-circle | -         |    | 0.50      | c  | 0.27      | c   | 0.92      | b  | 0.17      | b  | 0.46        | c  |
|                                      | Y-Line   | -         |    | 0.48      | c  | 0.13      | c   | 2.02      | b  | 0.52      | b  | 0.79        | c  |
| Others<br>Auchenorrhyncha<br>species | Yellow   | -         |    | 32.78     | b  | 20.60     | b   | 55.23     | a  | 24.00     | a  | 33.15       | b  |
|                                      | Y-circle | -         |    | 46.25     | a  | 27.53     | ab  | 58.22     | a  | 24.90     | a  | 39.23       | ab |
|                                      | Y-Line   | -         |    | 43.98     | ab | 35.96     | a   | 59.92     | a  | 25.58     | a  | 41.36       | a  |
| F-value                              |          |           |    | 50.37     |    | 44.80     |     | 51.87     |    | 35.56     |    | 102.7       |    |
| P-value                              |          |           |    | < 0.00001 |    | < 0.00001 |     | < 0.00001 |    | < 0.00001 |    | < 0.00001   |    |
|                                      |          | ***       |    | ***       |    | ***       |     | ***       |    | ***       |    | ***         |    |
| Site A – 2019                        |          |           |    |           |    |           |     |           |    |           |    |             |    |
| Species                              | Traps    | May       |    | June      |    | July      |     | August    |    | September |    | Mean months |    |
| <i>P. spumarius</i>                  | Yellow   | 0.75      | b  | 4.33      | b  | 1.17      | b   | 1.25      | c  | 0.50      | b  | 1.60        | b  |
|                                      | Y-circle | 1.13      | b  | 4.08      | b  | 1.50      | b   | 1.50      | c  | 0.46      | b  | 1.73        | b  |
|                                      | Y-Line   | 0.92      | b  | 4.08      | b  | 1.54      | b   | 1.33      | c  | 0.75      | b  | 1.72        | b  |
| <i>N. campestris</i>                 | Yellow   | 0.17      | b  | 0.33      | b  | 0.25      | b   | 0.04      | c  | 0.00      | b  | 0.16        | b  |
|                                      | Y-circle | 0.54      | b  | 0.33      | b  | 0.46      | b   | 0.13      | c  | 0.00      | b  | 0.29        | b  |
|                                      | Y-Line   | 0.13      | b  | 0.42      | b  | 0.25      | b   | 0.17      | c  | 0.00      | b  | 0.19        | b  |
| Others<br>Auchenorrhyncha<br>species | Yellow   | 25.63     | a  | 249.88    | a  | 61.67     | a   | 87.58     | a  | 32.25     | a  | 91.40       | a  |
|                                      | Y-circle | 20.80     | a  | 205.58    | a  | 58.88     | a   | 71.38     | b  | 28.17     | a  | 76.96       | a  |
|                                      | Y-Line   | 20.63     | a  | 255.08    | a  | 63.17     | a   | 72.75     | ab | 32.17     | a  | 88.76       | a  |
| F-value                              |          | 24.60     |    | 51.03     |    | 87.03     |     | 116.21    |    | 34.00     |    | 110.75      |    |
| P-value                              |          | < 0.00001 |    | < 0.00001 |    | < 0.00001 |     | < 0.00001 |    | < 0.00001 |    | < 0.00001   |    |
|                                      |          | ***       |    | ***       |    | ***       |     | ***       |    | ***       |    | ***         |    |
| Site B – 2019                        |          |           |    |           |    |           |     |           |    |           |    |             |    |
| Species                              | Traps    | May       |    | June      |    | July      |     | August    |    | September |    | Mean months |    |
| <i>P. spumarius</i>                  | Yellow   | 0.13      | b  | 1.88      | b  | 2.63      | bc  | 1.88      | b  | 3.38      | bc | 1.98        | b  |
|                                      | Y-circle | 0.00      | b  | 1.13      | b  | 3.00      | bc  | 1.63      | b  | 3.63      | bc | 1.88        | b  |
|                                      | Y-Line   | 0.00      | b  | 1.13      | b  | 2.50      | bc  | 2.88      | b  | 3.50      | bc | 2.00        | b  |
| <i>N. campestris</i>                 | Yellow   | 0.00      | b  | 0.25      | b  | 0.00      | c   | 0.00      | b  | 0.00      | c  | 0.05        | b  |
|                                      | Y-circle | 0.00      | b  | 0.25      | b  | 0.00      | c   | 0.00      | b  | 0.00      | c  | 0.05        | b  |
|                                      | Y-Line   | 0.00      | b  | 0.25      | b  | 0.25      | c   | 0.00      | b  | 0.00      | c  | 0.10        | b  |
| Others<br>Auchenorrhyncha<br>species | Yellow   | 3.38      | ab | 26.75     | a  | 6.13      | abc | 20.25     | a  | 12.63     | a  | 13.83       | a  |
|                                      | Y-circle | 4.00      | ab | 24.38     | a  | 11.38     | a   | 15.63     | a  | 12.13     | a  | 13.50       | a  |
|                                      | Y-Line   | 7.25      | a  | 30.50     | a  | 9.50      | ab  | 15.50     | a  | 10.25     | ab | 14.60       | a  |
| F-value                              |          | 5.23      |    | 29.49     |    | 5.29      |     | 23.71     |    | 8.87      |    | 38.63       |    |
| P-value                              |          | < 0.00001 |    | < 0.00001 |    | < 0.00001 |     | < 0.00001 |    | < 0.00001 |    | < 0.00001   |    |
|                                      |          | ***       |    | ***       |    | ***       |     | ***       |    | ***       |    | ***         |    |

Supplementary Table S2. Repeated measures ANOVA for the captures of spittlebugs and others Auchenorrhyncha species on colored traps hanged on almond trees

| Site A - 2018                        |          |           |     |           |    |           |     |           |    |           |     |             |    |
|--------------------------------------|----------|-----------|-----|-----------|----|-----------|-----|-----------|----|-----------|-----|-------------|----|
| Species                              | Traps    | May       |     | June      |    | July      |     | August    |    | September |     | Mean months |    |
| <i>P. spumarius</i>                  | Yellow   | -         |     | 13.05     | a  | 12.28     | ab  | 53.84     | b  | 12.28     | a   | 22.86       | b  |
|                                      | Y-circle | -         |     | 14.30     | a  | 11.47     | abc | 65.82     | a  | 13.32     | a   | 26.23       | ab |
|                                      | Y-Line   | -         |     | 14.82     | a  | 16.30     | a   | 62.53     | ab | 13.62     | a   | 26.82       | a  |
| <i>N. campestris</i>                 | Yellow   | -         |     | 2.17      | b  | 1.72      | c   | 8.64      | c  | 1.58      | b   | 3.53        | d  |
|                                      | Y-circle | -         |     | 1.57      | b  | 1.87      | c   | 10.16     | c  | 1.70      | b   | 3.82        | d  |
|                                      | Y-Line   | -         |     | 2.60      | b  | 2.77      | c   | 10.57     | c  | 2.05      | b   | 4.50        | d  |
| Others<br>Auchenorrhyncha<br>species | Yellow   | -         |     | 14.97     | a  | 10.23     | abc | 1.66      | c  | 0.87      | b   | 6.93        | c  |
|                                      | Y-circle | -         |     | 14.03     | a  | 4.40      | cd  | 1.44      | c  | 1.47      | b   | 5.33        | c  |
|                                      | Y-Line   | -         |     | 17.70     | a  | 7.35      | bcd | 2.22      | c  | 1.42      | b   | 7.17        | c  |
| F-value                              |          |           |     | 18.03     |    | 9.74      |     | 147.07    |    | 45.19     |     | 171.8       |    |
| P-value                              |          |           |     | < 0.00001 |    | < 0.00001 |     | < 0.00001 |    | < 0.00001 |     | < 0.00001   |    |
|                                      |          | —         |     | ***       |    | ***       |     | ***       |    | ***       |     | ***         |    |
| Site A – 2019                        |          |           |     |           |    |           |     |           |    |           |     |             |    |
| Species                              | Traps    | May       |     | June      |    | July      |     | August    |    | September |     | Mean months |    |
| <i>P. spumarius</i>                  | Yellow   | 2.79      | bcd | 8.13      | c  | 217.00    | b   | 3.21      | b  | 2.54      | ab  | 46.73       | c  |
|                                      | Y-circle | 3.00      | bcd | 7.50      | c  | 2.67      | b   | 2.33      | b  | 1.92      | ab  | 3.48        | c  |
|                                      | Y-Line   | 2.92      | bcd | 6.92      | c  | 2.55      | b   | 1.92      | b  | 2.21      | ab  | 3.30        | c  |
| <i>N. campestris</i>                 | Yellow   | 1.50      | cd  | 1.63      | c  | 0.38      | b   | 0.42      | b  | 0.29      | b   | 0.84        | d  |
|                                      | Y-circle | 0.96      | d   | 1.21      | c  | 0.58      | b   | 0.38      | b  | 0.29      | b   | 0.68        | d  |
|                                      | Y-Line   | 1.04      | cd  | 1.04      | c  | 0.42      | b   | 0.33      | b  | 0.21      | b   | 0.61        | d  |
| Others<br>Auchenorrhyncha<br>species | Yellow   | 3.29      | bc  | 21.96     | b  | 7.46      | a   | 8.71      | a  | 4.38      | a   | 9.16        | b  |
|                                      | Y-circle | 4.88      | ab  | 25.83     | ab | 6.50      | a   | 7.83      | a  | 4.29      | a   | 9.87        | ab |
|                                      | Y-Line   | 6.00      | a   | 34.04     | a  | 7.25      | a   | 8.04      | a  | 3.58      | a   | 11.78       | a  |
| F-value                              |          | 10.65     |     | 25.92     |    | 25.65     |     | 28.40     |    | 7.62      |     | 70.89       |    |
| P-value                              |          | < 0.00001 |     | < 0.00001 |    | < 0.00001 |     | < 0.00001 |    | < 0.00001 |     | < 0.00002   |    |
|                                      |          | ***       |     | ***       |    | ***       |     | ***       |    | ***       |     | ***         |    |
| Site B – 2019                        |          |           |     |           |    |           |     |           |    |           |     |             |    |
| Species                              | Traps    | May       |     | June      |    | July      |     | August    |    | September |     | Mean months |    |
| <i>P. spumarius</i>                  | Yellow   | 0.13      | b   | 1.50      | b  | 0.88      | c   | 0.88      | b  | 1.38      | bc  | 0.95        | b  |
|                                      | Y-circle | 0.13      | b   | 2.00      | b  | 1.75      | c   | 0.75      | b  | 1.75      | bc  | 1.28        | b  |
|                                      | Y-Line   | 0.00      | b   | 1.75      | b  | 1.13      | c   | 1.38      | b  | 2.13      | abc | 1.28        | b  |
| <i>N. campestris</i>                 | Yellow   | 0.00      | b   | 0.13      | b  | 0.25      | c   | 0.13      | b  | 0.00      | c   | 0.10        | b  |
|                                      | Y-circle | 0.13      | b   | 0.13      | b  | 0.00      | c   | 0.00      | b  | 0.00      | c   | 0.05        | b  |
|                                      | Y-Line   | 0.00      | b   | 0.00      | b  | 0.13      | c   | 0.00      | b  | 0.00      | c   | 0.03        | b  |
| Others<br>Auchenorrhyncha<br>species | Yellow   | 3.00      | a   | 17.63     | a  | 2.50      | bc  | 6.75      | a  | 3.13      | ab  | 6.60        | a  |
|                                      | Y-circle | 4.00      | a   | 17.75     | a  | 5.25      | a   | 6.63      | a  | 4.00      | ab  | 7.53        | a  |
|                                      | Y-Line   | 4.63      | a   | 23.38     | a  | 4.50      | ab  | 7.25      | a  | 4.63      | a   | 8.88        | a  |
| F-value                              |          | 3.39      |     | 14.21     |    | 10.55     |     | 14.00     |    | 9.18      |     | 21.54       |    |
| P-value                              |          | < 0.0030  |     | < 0.00001 |    | < 0.00001 |     | < 0.00001 |    | < 0.00001 |     | < 0.00001   |    |
|                                      |          | **        |     | ***       |    | ***       |     | ***       |    | ***       |     | ***         |    |

Supplementary Table S3. Repeated measures ANOVA for the captures of spittlebugs and others Auchenorrhyncha species on colored traps hanged on cherry trees

| Site A - 2019                     |          |           |     |           |     |           |     |           |    |           |    |             |    |
|-----------------------------------|----------|-----------|-----|-----------|-----|-----------|-----|-----------|----|-----------|----|-------------|----|
| Species                           | Traps    | May       |     | June      |     | July      |     | August    |    | September |    | Mean months |    |
| <i>P. spumarius</i>               | Yellow   | 0.71      | bc  | 1.63      | b   | 0.92      | abc | 1.42      | ab | 0.83      | ab | 1.10        | c  |
|                                   | Y-circle | 0.75      | bc  | 1.50      | b   | 1.21      | abc | 1.00      | ab | 0.75      | ab | 1.04        | c  |
|                                   | Y-Line   | 0.83      | abc | 3.33      | b   | 0.79      | bc  | 1.08      | ab | 1.13      | a  | 1.43        | c  |
| <i>N. campestris</i>              | Yellow   | 0.08      | c   | 0.25      | b   | 0.29      | c   | 0.04      | b  | 0.00      | b  | 0.13        | c  |
|                                   | Y-circle | 0.04      | c   | 0.58      | b   | 0.00      | c   | 0.21      | b  | 0.00      | b  | 0.17        | c  |
|                                   | Y-Line   | 0.21      | c   | 0.96      | b   | 0.21      | c   | 0.13      | b  | 0.04      | b  | 0.31        | c  |
| Others<br>Auchenorrhyncha species | Yellow   | 2.29      | ab  | 9.75      | a   | 4.00      | a   | 3.00      | ab | 1.00      | a  | 4.01        | a  |
|                                   | Y-circle | 1.33      | abc | 2.25      | ab  | 2.67      | ab  | 1.88      | ab | 0.71      | a  | 1.77        | bc |
|                                   | Y-Line   | 2.58      | a   | 5.63      | ab  | 4.04      | a   | 3.71      | a  | 1.13      | a  | 3.42        | ab |
| F-value                           |          | 5.42      |     | 4.37      |     | 4.82      |     | 2.63      |    | 3.48      |    | 8.35        |    |
| P-value                           |          | < 0.00001 |     | < 0.00001 |     | < 0.00001 |     | 0.01      |    | 0.00      |    | < 0.00001   |    |
|                                   |          | ***       |     | ***       |     | ***       |     | **        |    | ***       |    | ***         |    |
| Site B – 2019                     |          |           |     |           |     |           |     |           |    |           |    |             |    |
| <i>Species</i>                    |          |           |     |           |     |           |     |           |    |           |    |             |    |
| <i>Species</i>                    | Traps    | May       |     | June      |     | July      |     | August    |    | September |    | Mean months |    |
| <i>P. spumarius</i>               | Yellow   | 0.25      | c   | 2.25      | bc  | 0.75      | b   | 1.13      | cd | 1.75      | ab | 1.23        | b  |
|                                   | Y-circle | 0.13      | c   | 1.13      | bc  | 2.88      | ab  | 1.50      | cd | 2.38      | ab | 1.60        | b  |
|                                   | Y-Line   | 0.00      | c   | 2.38      | bc  | 1.88      | b   | 1.00      | cd | 1.75      | ab | 1.40        | b  |
| <i>N. campestris</i>              | Yellow   | 0.00      | c   | 0.25      | c   | 0.38      | b   | 0.13      | d  | 0.00      | b  | 0.15        | b  |
|                                   | Y-circle | 0.00      | c   | 0.00      | c   | 0.00      | b   | 0.25      | d  | 0.00      | b  | 0.05        | b  |
|                                   | Y-Line   | 0.00      | c   | 0.13      | c   | 0.13      | b   | 0.25      | d  | 0.00      | b  | 0.10        | b  |
| Others<br>Auchenorrhyncha species | Yellow   | 1.88      | a   | 10.13     | abc | 4.50      | ab  | 4.38      | bc | 6.75      | a  | 5.53        | a  |
|                                   | Y-circle | 1.25      | b   | 11.50     | ab  | 9.63      | a   | 7.38      | ab | 6.13      | a  | 7.18        | a  |
|                                   | Y-Line   | 0.75      | b   | 16.00     | a   | 9.38      | a   | 10.00     | a  | 5.88      | a  | 8.40        | a  |
| F-value                           |          | 2.21      |     | 6.75      |     | 6.28      |     | 15.34     |    | 4.84      |    | 18.46       |    |
| P-value                           |          | 0.04      |     | < 0.00001 |     | < 0.00001 |     | < 0.00001 |    | < 0.00001 |    | < 0.00001   |    |
|                                   |          | ±         |     | ***       |     | ***       |     | ***       |    | ***       |    | ***         |    |

Supplementary Table S4. Mean captures  $\pm$ SE of *Philaenus spumarius* adults by sweep net and on sticky traps at site A and B on olive trees during 2018 and 2019.

| Site A             |     |              |              |          |          | Site B       |              |          |          |
|--------------------|-----|--------------|--------------|----------|----------|--------------|--------------|----------|----------|
| Period inspections |     | Mean (± SE)  |              | t-values | p-values | Mean (± SE)  |              | t-values | p-values |
|                    |     | Sweep net    | Traps        |          |          | Sweep net    | Traps        |          |          |
| 2018               |     |              |              |          |          |              |              |          |          |
| Aug                | 2nd | 4.00 (±0.58) | 2.05 (±0.44) | 2.69     | 0.0052   | -            | -            | -        | -        |
| Sept               | 1st | 0.25 (±0.10) | 0.80 (±0.28) | 1.87     | 0.0348   | -            | -            | -        | -        |
|                    | 2nd | 1.80 (±0.35) | 0.65 (±0.15) | 3.00     | 0.0024   | -            | -            | -        | -        |
| Oct                | 1st | 0.15 (±0.08) | 0.75 (±0.18) | 3.09     | 0.0019   | -            | -            | -        | -        |
|                    | 2nd | 0.00 (±0.00) | 0.08 (±0.04) | 2.13     | 0.0974   | -            | -            | -        | -        |
| 2019               |     |              |              |          |          |              |              |          |          |
| May                | 1st | 0.00 (±0.00) | 0.00 (±0.00) | 0.00     | 0.5000   | 0.00 (±0.00) | 0.00 (±0.00) | 0.00     | 0.5000   |
|                    | 2nd | 0.65 (±0.20) | 0.10 (±0.07) | 2.65     | 0.0058   | 0.15 (±0.08) | 0.04 (±0.04) | 1.24     | 0.1113   |
| June               | 1st | 1.90 (±0.48) | 1.40 (±0.34) | 0.85     | 0.1995   | 4.00 (±0.17) | 0.04 (±0.04) | 2.24     | 0.0153   |
|                    | 2nd | 0.90 (±0.24) | 2.10 (±0.38) | 2.69     | 0.0053   | 0.50 (±0.14) | 1.33 (±0.27) | 2.62     | 0.0061   |
| July               | 1st | 0.60 (±0.21) | 0.90 (±0.25) | 0.92     | 0.1823   | 0.65 (±0.17) | 1.63 (±0.27) | 2.89     | 0.0304   |
|                    | 2nd | 0.95 (±0.25) | 0.90 (±0.23) | 0.15     | 0.4411   | 0.30 (±0.13) | 1.08 (±0.34) | 2.00     | 0.0258   |
| Aug                | 1st | 1.00 (±0.23) | 0.75 (±0.26) | 0.72     | 0.2378   | 0.50 (±0.18) | 0.63 (±0.20) | 0.45     | 0.3258   |
|                    | 2nd | 0.30 (±0.11) | 1.25 (±0.27) | 3.28     | 0.0011   | 0.20 (±0.09) | 1.50 (±0.37) | 3.13     | 0.0016   |
| Sept               | 1st | 0.10 (±0.07) | 0.60 (±0.34) | 1.46     | 0.0763   | 0.30 (±0.13) | 3.96 (±0.54) | 5.35     | 0.0000   |
|                    | 2nd | 0.25 (±0.10) | 1.05 (±0.42) | 1.85     | 0.0357   | 0.60 (±0.17) | 0.25 (±0.17) | 1.43     | 0.0796   |
| Oct                | 1st | 0.10 (±0.07) | 0.10 (±0.10) | 0.00     | 0.5000   | 0.35 (±0.13) | 0.46 (±0.17) | 0.49     | 0.3138   |
|                    | 2nd | 0.05 (±0.05) | 0.50 (±0.22) | 1.96     | 0.0284   | 0.05 (±0.05) | 0.42 (±0.13) | 2.39     | 0.0107   |

Supplementary Table S5. Mean captures  $\pm$ SE of *Philaenus spumarius* adults by sweep net and on sticky traps at site A and B on almond trees during 2018 and 2019.

| Site A             |      |              |               |          |          | Site B       |              |          |          |
|--------------------|------|--------------|---------------|----------|----------|--------------|--------------|----------|----------|
| Period inspections |      | Mean (± SE)  |               | t-values | p-values | Mean (± SE)  |              | t-values | p-values |
|                    |      | Sweep net    | Traps         |          |          | Sweep net    | Traps        |          |          |
| 2018               |      |              |               |          |          |              |              |          |          |
| Aug                | 2nd  | 1.15 (±0.24) | 27.15 (±1.11) | 22.96    | <0,00001 | -            | -            | -        | -        |
| Sept               | 1st  | 0.95 (±0.25) | 12.25 (±1.57) | 7.10     | <0,00001 | -            | -            | -        | -        |
|                    | 2nd  | 0.90 (±0.27) | 4.74 (±0.38)  | 8.45     | <0,00001 | -            | -            | -        | -        |
| Oct                | 1st  | 0.15 (±0.08) | 2.55 (±0.92)  | 2.60     | 0.0066   | -            | -            | -        | -        |
|                    | 2nd  | 0.20 (±0.09) | 0.10 (±0.04)  | 0.87     | 0.1944   | -            | -            | -        | -        |
| 2019               |      |              |               |          |          |              |              |          |          |
| May                | 1st  | 0.00 (±0.00) | 0.00 (±0.00)  | 0.00     | 0.5000   | 0.05 (±0.05) | 0.00 (±0.00) | 1.00     | 0.1618   |
|                    | 2nd  | 0.15 (±0.08) | 0.20 (±0.12)  | 0.35     | 0.3641   | 0.15 (±0.08) | 0.08 (±0.06) | 0.68     | 0.2496   |
| June               | 1st  | 1.55 (±0.53) | 3.30 (±0.51)  | 2.38     | 0.0112   | 0.35 (±0.17) | 0.21 (±0.08) | 0.80     | 0.2152   |
|                    | 2nd  | 2.10 (±0.41) | 3.00 (±0.44)  | 1.49     | 0.0716   | 0.15 (±0.08) | 1.54 (±0.30) | 4.11     | 0.0001   |
| July               | 1st  | 0.75 (±0.22) | 1.60 (±0.32)  | 2.20     | 0.0169   | 0.15 (±0.11) | 0.46 (±0.12) | 1.87     | 0.0345   |
|                    | 2nd  | 0.40 (±0.13) | 0.85 (±0.25)  | 1.57     | 0.0672   | 0.30 (±0.13) | 0.96 (±0.26) | 1.58     | 0.0604   |
| Aug                | 1st  | 0.50 (±0.18) | 1.10 (±0.27)  | 1.83     | 0.0375   | 0.00 (±0.00) | 0.21 (±0.08) | 2.24     | 0.0152   |
|                    | 2nd  | 0.15 (±0.08) | 1.35 (±0.33)  | 3.48     | 0.0006   | 0.05 (±0.05) | 0.79 (±0.19) | 3.47     | 0.0007   |
| Sept               | 1st  | 0.10 (±0.07) | 2.45 (±0.55)  | 4.20     | 0.0001   | 0.00 (±0.00) | 1.75 (±0.28) | 5.75     | <0,00001 |
|                    | 2nd  | 0.05 (±0.05) | 1.10 (±0.43)  | 2.43     | 0.0099   | 0.00 (±0.00) | 0.13 (±0.07) | 1.65     | 0.0532   |
| Oct                | 1st  | 0.00 (±0.00) | 0.45 (±0.18)  | 2.44     | 0.0098   | 0.00 (±0.00) | 0.50 (±0.17) | 2.68     | 0.0053   |
|                    | 2nde | 0.00 (±0.00) | 1.55 (±0.28)  | 5.62     | 0.0000   | 0.00 (±0.00) | 1.17 (±0.32) | 3.30     | 0.0099   |

Supplementary Table S6. Mean captures  $\pm$ SE of *Philaenus spumarius* adults by sweep net and on sticky traps at in-site A and B on cherry trees during 2018 and 2019.

| Site A             |     |              |              |          |          | Site B       |              |          |          |
|--------------------|-----|--------------|--------------|----------|----------|--------------|--------------|----------|----------|
| Period inspections |     | Mean (± SE)  |              | t-values | p-values | Mean (± SE)  |              | t-values | p-values |
|                    |     | Sweep net    | Traps        |          |          | Sweep net    | Traps        |          |          |
| 2019               |     |              |              |          |          |              |              |          |          |
| May                | 1st | 0.20 (±0.09) | 0.20 (±0.00) | 2.18     | 0.0018   | 0.05 (±0.05) | 0.00 (±0.00) | 1.10     | 0.1392   |
|                    | 2nd | 2.15 (±0.34) | 0.10 (±0.07) | 5.87     | 0.00001  | 0.30 (±0.16) | 0.13 (±0.07) | 0.98     | 0.1577   |
| June               | 1st | 1.50 (±0.27) | 0.80 (±0.30) | 1.76     | 0.0433   | 0.60 (±0.21) | 0.33 (±0.13) | 1.12     | 0.1353   |
|                    | 2nd | 2.05 (±0.36) | 1.05 (±0.48) | 1.66     | 0.0526   | 0.25 (±0.10) | 1.58 (±0.36) | 3.28     | 0.0010   |
| July               | 1st | 1.10 (±0.28) | 0.65 (±0.22) | 1.26     | 0.1073   | 0.50 (±0.20) | 1.00 (±0.25) | 1.53     | 0.0669   |
|                    | 2nd | 1.10 (±0.26) | 0.35 (±0.17) | 2.42     | 0.01     | 0.05 (±0.05) | 0.83 (±0.21) | 3.27     | 0.0107   |
| Aug                | 1st | 0.80 (±0.20) | 0.40 (±0.24) | 1.26     | 0.1068   | 0.10 (±0.07) | 0.29 (±0.09) | 1.58     | 0.0619   |
|                    | 2nd | 1.50 (±0.34) | 1.10 (±0.35) | 0.81     | 0.2117   | 0.00 (±0.00) | 0.92 (±0.22) | 3.86     | 0.0002   |
| Sept               | 1st | 2.45 (±0.63) | 1.00 (±0.44) | 1.89     | 0.033    | 0.35 (±0.18) | 1.95 (±0.37) | 3.68     | 0,000329 |
|                    | 2nd | 1.15 (±0.37) | 1.00 (±0.36) | 0.29     | 0.3861   | 0.25 (±0.10) | 0.25 (±0.18) | 0.00     | 0.5000   |
| Oct                | 1st | 1.25 (±0.25) | 0.85 (±0.38) | 0.88     | 0.1919   | 0.15 (±0.08) | 0.92 (±0.22) | 2.98     | 0.0024   |
|                    | 2nd | 0.30 (±0.21) | 1.00 (±0.37) | 1.65     | 0.0534   | 0.60 (±0.17) | 1.42 (±0.33) | 2.08     | 0.0218   |
