# Supplementary figures and images for: Comparing Different Sticky Traps to Monitor the Occurrence of Philaenus spumarius and Neophilaenus campestris, Vectors of Xylella fastidiosa, in Different Crops
Source: MDPI journal article supplement (doi:10.3390/insects14090777), 2023-09-21

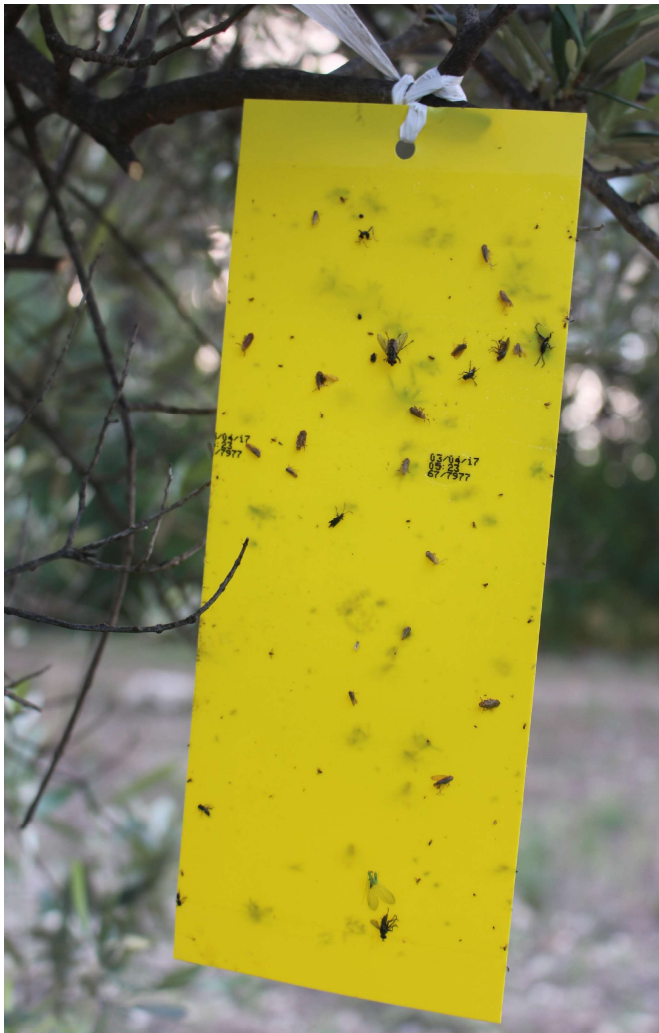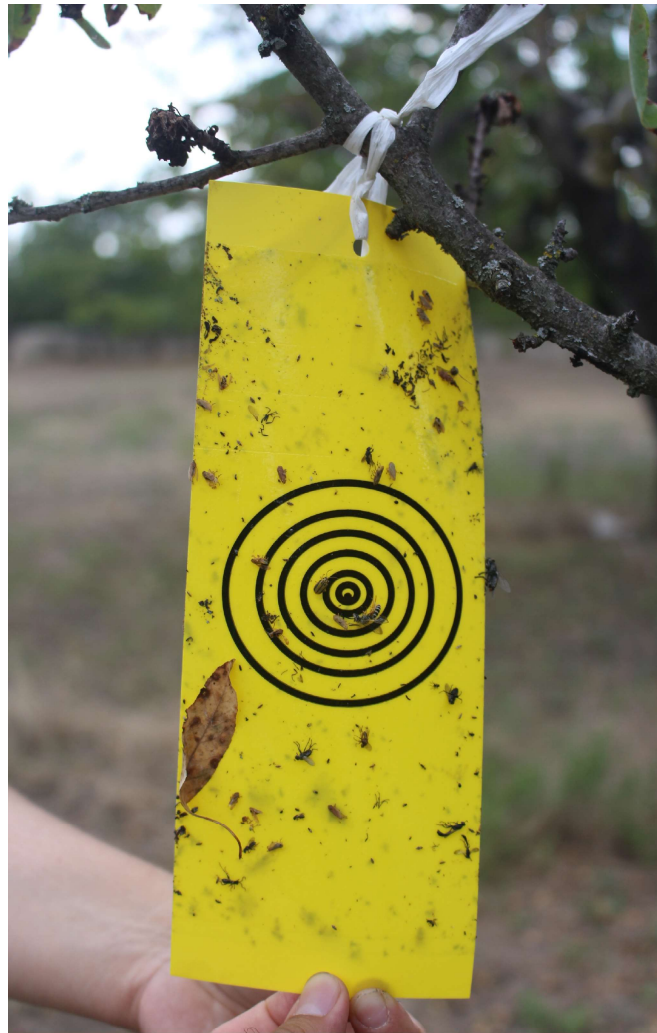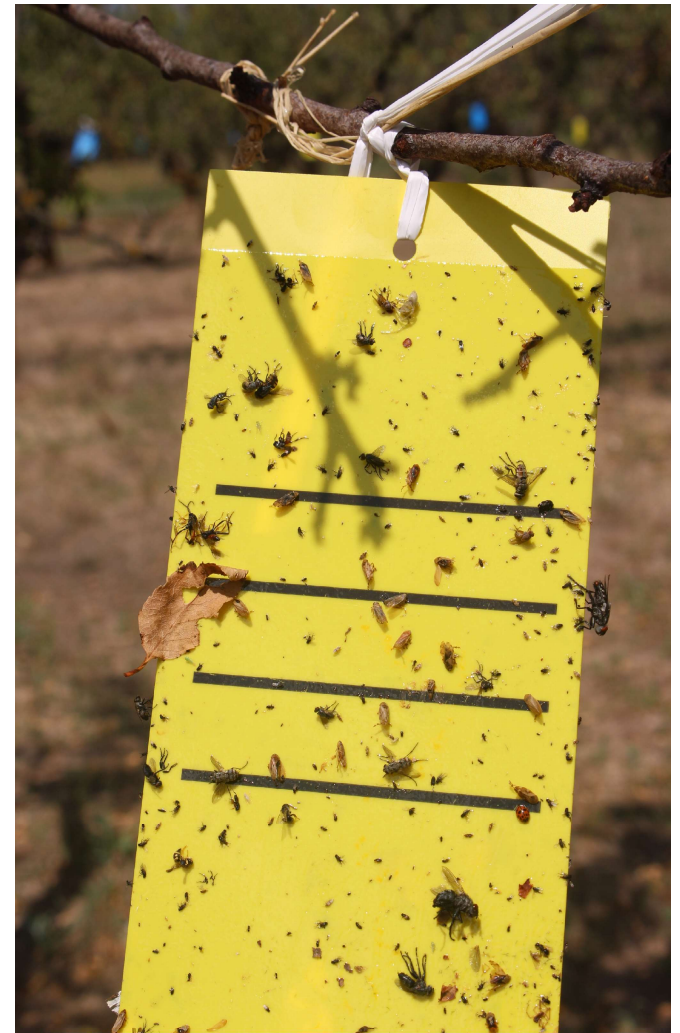

Figure S1. Yellow Sticky traps used in the experiments.

Supplement: s1 [file s1]
